# Supplementary material for: Simultaneously improving the mechanical properties and flame retardancy of polypropylene using functionalized carbon nanotubes by covalently wrapping flame retardants followed by linking polypropylene
Source: Royal Society of Chemistry journal article supplement (doi:10.1039/c6qm00172f), 2016-10-24
Supplement: c6qm00172f1.pdf [file c6qm00172f1.pdf]

Supporting Information for

## Simultaneously improving the mechanical properties and flame retardancy of polypropylene using functionalized carbon nanotubes by covalently wrapping flame retardant followed by linking polypropylene

5 Hongfan Yang, Lin Ye, Jiang Gong, Minggang Li, Zhiwe Jiang, Xin Wen,\* Hao Chen, Nana Tian, and Tao Tang\*

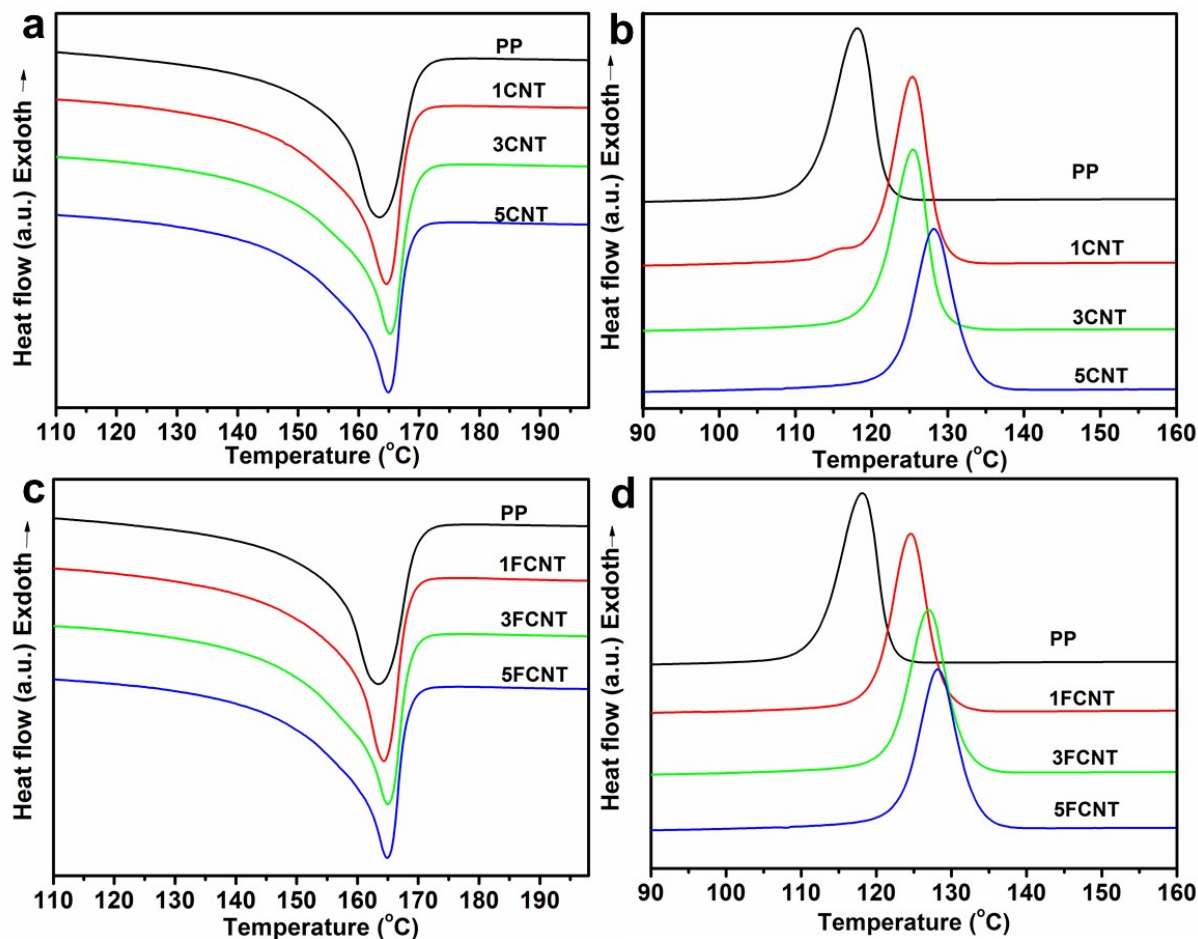

**Fig. S1** (a) Second heating curves of PP/CNTs composites; (b) Cooling curves of PP/CNTs composites; (c) Second heating curves of PP/FCNT composites; (d) crystallization curves of PP/FCNT composites.

The crystallinity of the samples is calculated as the following equation:  $X_c = \Delta H_m / (f\Delta H_0)$ , where  $\Delta H_0 = 209 \text{ J g}^{-1}$  is the theoretical melting enthalpy of the 100% crystalline PP, and  $f$  is the weight fraction of PP in the composite.

---

**Table S1** Summary of the DSC results of PP and its composites.

---

| Sample | $T_c$ (°C) | $T_m$ (°C) | $\Delta H_m$ (J g <sup>-1</sup> ) | $X_c$ (%) |
|--------|------------|------------|-----------------------------------|-----------|
| PP     | 118.3      | 163.6      | 94.11                             | 45.03     |
| 1CNT   | 125.7      | 164.7      | 95.62                             | 46.21     |
| 3CNT   | 125.4      | 165.2      | 94.44                             | 46.60     |
| 5CNT   | 126.4      | 165.1      | 91.88                             | 46.28     |
| 1FCNT  | 124.4      | 164.4      | 94.01                             | 45.43     |
| 3FCNT  | 127.0      | 165.0      | 94.04                             | 46.38     |
| 5FCNT  | 127.9      | 165.0      | 91.06                             | 45.86     |

---
